# Supplementary material for: Rapid replacement by non-vaccine pneumococcal serotypes may mitigate the impact of the pneumococcal conjugate vaccine on nasopharyngeal bacterial ecology
Source: PubMed Central journal article supplement (PMC5557800; doi:10.1038/s41598-017-08717-0), 2017-08-15
Supplement: 41598_2017_8717_MOESM1_ESM.pdf [file 41598_2017_8717_MOESM1_ESM.pdf]

**Rapid replacement by non-vaccine pneumococcal serotypes may mitigate the impact of the pneumococcal conjugate vaccine on nasopharyngeal bacterial ecology**

Brenda Kwambana-Adams<sup>1,3</sup>, Blake Hanson<sup>2</sup>, Archibald Worwui<sup>1</sup>, Schadrac Agbla<sup>1,3</sup>, Ebenezer Foster-Nyarko<sup>1</sup>, Fatima Ceesay<sup>1</sup>, Chinelo Ebruke<sup>1,3</sup>, Uzochukwu Egere<sup>1</sup>, Yanjiao Zhou<sup>2</sup>, Maze Ndukum<sup>4</sup>, Erica Sodergren<sup>2</sup>, Michael Barer<sup>5</sup>, Richard Adegbola<sup>6</sup>, George Weinstock<sup>2</sup> & Martin Antonio<sup>1,3,7</sup>

**Supplementary Table 1. Mixed effects model investigating factors associated with richness**

| <b>Variable</b>      | <b>Category</b> | <b>Change in mean square root of richness (95% CI)</b> | <b>p</b> | <b>Overall p</b> |
|----------------------|-----------------|--------------------------------------------------------|----------|------------------|
| <b>Age</b>           | Age(weeks)      | -0.01 (-0.03, 0.01)                                    | 0.30     | 0.30             |
| <b>Group</b>         | Group 1         |                                                        |          |                  |
|                      | Group 2         | 0.20 (-0.39, 0.78)                                     | 0.51     | 0.15             |
|                      | Group 3         | 0.54 (-0.01, 1.09)                                     | 0.05     |                  |
| <b>Period</b>        | 0 - 9 weeks     |                                                        |          |                  |
|                      | 11-17 weeks     | 0.75 (0.41, 1.10)                                      | <0.01    | <0.01            |
|                      | 19 - 27 weeks   | 0.82 (0.30, 1.34)                                      | <0.01    |                  |
|                      | 29 - 52 weeks   | 0.78 (-0.24, 1.79)                                     | 0.13     |                  |
| <b>Siblings</b>      | 0               |                                                        |          |                  |
|                      | 1-3             | 0.81 (0.01, 1.61)                                      | 0.048    | 0.04             |
|                      | >3              | 1.25 (0.28, 2.22)                                      | 0.01     |                  |
| <b>Mother's age</b>  | <20             |                                                        |          |                  |
|                      | 20-34           | -1.19 (-2.08, -0.30)                                   | <0.01    | <0.01            |
|                      | >35 and above   | -2.20 (-3.33, -1.07)                                   | <0.01    |                  |
| <b>Breastfeeding</b> | 0               |                                                        |          |                  |
|                      | 1               | 0.05 (-0.38, 0.48)                                     | 0.82     | 0.05             |
|                      | 2               | -0.45 (-0.83, -0.07)                                   | 0.02     |                  |
|                      | 3               | -2.04 (-4.68, 0.59)                                    | 0.13     |                  |

**Supplementary Table 2. Mixed effects model investigating factors associated with Shannon diversity**

| <b>Variable</b>      | <b>Category</b> | <b>Change in Shannon diversity (95% CI)</b> | <b>p</b> | <b>Overall p</b> |
|----------------------|-----------------|---------------------------------------------|----------|------------------|
| <b>Age</b>           | Age(weeks)      | -0.06 (-0.08, -0.03)                        | <0.01    | <0.01            |
| <b>Group</b>         | Group 1         |                                             |          |                  |
|                      | Group 2         | -0.06 (-0.21, 0.08)                         | 0.40     | 0.48             |
|                      | Group 3         | -0.09 (-0.23, 0.05)                         | 0.22     |                  |
| <b>*Period</b>       | 0 - 9 weeks     |                                             |          |                  |
|                      | 11-17 weeks     | -0.21 (-0.71, 0.28)                         | 0.40     | 0.43             |
|                      | 19 - 27 weeks   | -0.40 (-0.98, 0.18)                         | 0.18     |                  |
|                      | 29 - 52 weeks   | 0.16 (-0.41, 0.73)                          | 0.58     |                  |
| <b>Travel</b>        | No              |                                             |          |                  |
|                      | Yes             | 0.11 (0.01, 0.21)                           | 0.02     | 0.02             |
| <b>Mother's age</b>  | <20             |                                             |          |                  |
|                      | 20-34           | -0.15 (-0.35, 0.06)                         | 0.18     | 0.02             |
|                      | 35 and above    | -0.29 (-0.51, -0.07)                        | 0.01     |                  |
| <b>Breastfeeding</b> | 0               |                                             |          |                  |
|                      | 1               | -0.02 (-0.19, 0.14)                         | 0.78     | 0.04             |
|                      | 2               | -0.20 (-0.34, -0.05)                        | <0.01    |                  |
|                      | 3               | -0.70 (-1.70, 0.31)                         | 0.18     |                  |
